# Supplementary material for: Nontargeted metabolomics uncovering metabolite signatures in glioblastoma: a preliminary study on candidate biomarker discovery for IDH subtyping and survival prediction
Source: Front Oncol. 2025 May 8;15:1568040. doi: 10.3389/fonc.2025.1568040 (PMC12095168; doi:10.3389/fonc.2025.1568040)
Supplement: Supplementary file 1 [file Table1.xlsx]

## Sheet: Table 1
Patient ID	Age	Sex	Survival Status	Headache	Neurological Dyfunction	Karnofsky Score	Activities of Daily Living	Tumor Size (mm)	Location Hemisphere	Hemorrhage	Molecular Mutation/Diagnosis	GFAP (Glial Fibrillary Acidic Protein)	PT (Prothrombin Time, s)	INR（International Normalized Ratio）	ATPP (Activated Partial Thromboplastin Time, s)	FIB (Fibrinogen)	Overall Survival (weeks)
IDH_1	37	male	—	0	0	90	85	37*63*54	Left	0	IDH	—	—	—	—	—	—
IDH_10	30	female	Dead	1	1	80	60	65*60*45	Right	0	IDH	1	14.3	1.11	29.8	4.51	258.571
IDH_11	45	female	Alive	1	1	80	35	29*45*28	Right	0	IDH	1	13.1	0.97	31.2	3.25	58.5714
IDH_2	30	female	Alive	1	0	90	100	50*50*80	Right	0	IDH	1	13.4	1.02	37.5	3.5	418
IDH_4	44	male	Dead	0	0	100	95	70*60*70	Right	1	IDH	0	12.5	0.95	33	4.44	80.2857
IDH_5	51	male	Alive	1	0	100	100	50*40*50	Right	0	IDH	0.5	13.3	1.03	39.6	3.17	355.429
IDH_6	37	female	Alive	0	0	100	100	68*50*50	Right	0	IDH	2	14	1.1	38.6	2.97	357.286
IDH_7	52	male	Alive	1	0	90	65	42*52*58	Left	1	IDH	1	13.3	1.02	27	3.02	367.571
IDH_8	33	female	Dead	1	0	80	20	71*59*55	Left	0	IDH	3	16.2	1.31	31.6	2.5	134.571
IDH_9	38	female	Dead	1	0	60	30	88*66*60	Left	0	IDH	1	12.6	0.95	27.2	2.91	22.8571
WT_1	74	male	Dead	0	0	70	50	43*40*32	Left	0	WT	1	12.8	0.97	32.4	3.08	45
WT_10	54	female	Dead	1	0	100	100	60*50*45	Left	0	WT	1	14.5	1.13	32.1	2.74	179.143
WT_11	58	male	Dead	1	0	90	90	40*40*35	Left	0	WT	1	12.8	1	36.8	2.66	98.8571
WT_12	75	male	Dead	1	0	80	55	50*60*50	Right	1	WT	1	13.1	1.01	43	4.21	42
WT_15	60	male	Alive	0	1	80	55	47*33*56	Right	1	WT	1	13	0.96	38.1	4.22	54
WT_2	68	male	Dead	0	1	60	5	55*37*27	Left	0	WT	1	13.7	1.07	35	4.12	37.1429
WT_3	56	male	Dead	0	0	90	85	60*30*20	Right	0	WT	1	14	1.09	30.2	3.42	127.143
WT_4	54	female	Dead	0	1	70	55	57*35*45	Right	1	WT	1	13.3	1.03	32.5	3.85	96.8571
WT_7	43	male	Alive	1	1	80	90	67*65*60	Left	0	WT	1	13.6	1.04	36.8	3.07	147.286
WT_9	67	male	Dead	1	0	90	55	40*40*35	Left	0	WT	1	12.8	0.98	33.8	2.5	54.5714
CTRL_1	24	female	Alive	1	0	—	100	—	—	—	Temporal Lobe Cerebrovascular Tumor	—	15.2	1.24	1.11	—	—
CTRL_12	62	male	Alive	1	1	—		—	—	—	Right Parietal Lobe Hemorrhage	—	13.9	1.08	41.2	—	—
CTRL_13	73	female	Alive	1	0	—	45	—	—	—	Left Frontal Lobe Hemorrhage; Left Subdural Hemorrhage	—	12.3	0.94	28.4	—	—
CTRL_16	59	male	Alive	1	1	—	0	—	—	—	Left Fronto-Temporal Lobe Hemorrhage	—	14.5	1.15	31.7	—	—
CTRL_15	46	male	Alive	1	1	—	15	—	—	—	Left Parieto-Occipito-Temporal Lobe Hemorrhage	—	13.7	1.08	34.4	—	—
CTRL_17	41	female	Alive	1	1	—	40	—	—	—	Moyamoya Disease	—	14.1	1.11	32.7	—	—
CTRL_18	48	male	Alive	1	1	—	0	—	—	—	Basal Ganglia Hemorrhage	—	13.3	1.02	30.7	—	—
CTRL_2	56	male	Alive	0	1	—	100	—	—	—	Right Intracranial Cavernous Hemangioma	—	13.4	1.06	40.1	—	—
CTRL_3	33	male	Alive	0	0	—	100	—	—	—	Symptomatic Epilepsy	—	15	1.18	40.8	—	—
CTRL_4	67	male	Alive	1	1	—	10	—	—	—	Right Cerebral Contusion and Laceration; Right Subdural Hematoma	—	12.8	0.98	41.3	—	—
Table 1. Patient Clinical Information. "0" indicates the absence of symptoms, while "1" indicates the presence of symptoms. The patient with ID "IDH_1" was lost to follow-up.

## Sheet: Table 2
ID	Compounds	HMDB	KEGGID	Origin	Links	Mode	Class I	Class II	Formula	Q1 (Da)	Molecular weight (Da)	RT (min)	Adduct	Mass error	Level	score	LC mode	CAS	PubChem	Metlin	cpd_ID	CTRL_1	CTRL_2	CTRL_3	CTRL_4	CTRL_12	CTRL_13	CTRL_15	CTRL_16	CTRL_17	CTRL_18	IDH_1	IDH_2	IDH_4	IDH_5	IDH_6	IDH_7	IDH_8	IDH_9	IDH_10	IDH_11	WT_1	WT_2	WT_3	WT_4	WT_7	WT_9	WT_10	WT_11
M_22	Glycerophosphocholine	HMDB0000086	C00670	Human; Microbiota; Food related; Drug related	Microbiota(BIGG:g3pc ChEBI:16870 KEGG:C00670,D07349); Food related(FooDB:FDB030952 HMDB:HMDB0000086); Drug related(DrugBank:DB04660 KEGG:C00670,D07349)	T3_negative	GP	PC	C8H21NO6P+	292.072	258.111	0.7898	[M+Cl]-	1.58081	1	0.9445	rp	28319-77-9	439285	-	C00670	15023.8	55217.5	37624.6	2795.06	10083.4	6016.92	6152.62	6333.05	48123.7	29082.6	12296.8	54149.4	83710.7	37573.6	14809.4	62157.9	36534.5	55776.2	46775.8	9489.89	6342.61	10744.6	5322.27	16769.1	4908.17	16128.5	1910.42	14000.3
M_124	5-Aminolevulinic acid	HMDB0001149	C00430	Human; Microbiota; Food related; Drug related	Microbiota(BIGG:5aop ChEBI:17549 KEGG:C00430,D07567); Food related(FooDB:FDB022452 HMDB:HMDB0001149 T3DB:T3D4273); Drug related(DrugBank:DB00855 KEGG:C00430,D07567 T3DB:T3D4273)	T3_negative	Organic acid and Its derivatives	Organic acid and Its derivatives	C5H9NO3	112.04	131.058	0.8791	[M-H2O-H]-	0.6	1	0.9803	rp	106-60-5	137	6037	C00430	5824.63	8510.18	9489.11	9399.17	8971.38	3745.5	7645.21	5587.18	10459.5	7132.82	733.23	3450.59	3503.64	4064.09	6331	3810.85	3430.68	3238.21	1401.04	2580.76	2221.56	998.3	2634.11	471.42	1080.96	2932.85	2722.06	1628.88
M_43	Asparagine	HMDB0000168	C00152	Human; Microbiota; Food related; Drug related; Environment	Microbiota(BIGG:asn__L ChEBI:17196 KEGG:C00152); Food related(FooDB:FDB000787 HMDB:HMDB0000168 T3DB:T3D4362); Drug related(DrugBank:DB00174 T3DB:T3D4362); Environment(HMDB:HMDB0000168)	T3_positive	Amino acid and Its metabolites	Amino acids	C4H8N2O3	171.026	132.054	0.8965	[M+K]+	23.9588	1	0.5768	rp	70-47-3	6267	14	C00152	675951	731985	803013	717995	682911	646931	663070	638299	718791	630989	260540	7206.65	188564	589952	570129	145000	443270	371784	303596	272618	608420	681838	817905	675648	799165	597339	771049	677441
M_29	Dulcitol	HMDB0000107	C01697	Human; Microbiota; Food related	Microbiota(BIGG:galt ChEBI:16813 KEGG:C01697); Food related(FooDB:FDB006453 HMDB:HMDB0000107 T3DB:T3D4349)	T3_negative	Carbohydrates and Its metabolites	Sugar alcohols	C6H14O6	163.061	182.079	0.7898	[M-H2O-H]-	0.85	1	0.9879	rp	608-66-2	11850	5148	C01697	1010.03	1285.63	1720.55	815.02	1107.74	3655.41	1850.47	2023.34	2836.47	1878.68	4809.77	2929.51	6022.09	2306.22	3549.76	2645.52	7299.38	5485.35	3625.89	5805.41	2438.2	5969.31	3114.28	4531.06	6652.94	3829.76	8402.76	6210.99
M_118	gamma-Glutamylcysteine	HMDB0001049	C00669	Human; Microbiota; Food related; Drug related	Microbiota(BIGG:glucys ChEBI:17515 KEGG:C00669); Food related(FooDB:FDB003603 HMDB:HMDB0001049); Drug related(DrugBank:DB03408)	T3_negative	Amino acid and Its metabolites	Small Peptide	C8H14N2O5S	302.051	250.062	0.8791	[M+Cl+NH3]-	16.975	1	0.7759	rp	636-58-8	123938	5966	C00669	76865.1	118966	127836	148442	78063.7	90542.6	93361	57702.7	157367	86123.3	75638.5	216111	136481	55308.3	67424.3	17087.3	66483.8	83373.4	30290.4	15916	56670.6	228734	118999	335463	635024	226033	377703	103464
M_154	Itaconic acid	HMDB0002092	C00490	Human; Microbiota; Food related	Microbiota(BIGG:itacon ChEBI:17240,30838 HMDB:HMDB0002092 KEGG:C00490); Food related(FooDB:FDB012645 HMDB:HMDB0002092)	T3_negative	Organic acid and Its derivatives	Organic acid and Its derivatives	C5H6O4	129.019	130.027	1.2821	[M-H]-	0.519719	1	0.9092	rp	97-65-4	811	6483	C00490	3463.25	2372.53	2146.73	2454.31	3777.06	3619.91	3911.26	4005.42	3075.92	3763.58	37925.7	9057.58	19508.4	3650.5	5343.64	28713.6	104027	61652.9	95049.4	42063.3	2470.28	2966.71	3054.61	3113.72	3688.59	4437.77	5457.74	2934.67
M_49	L-Aspartic acid	HMDB0000191	C00049	Human; Microbiota; Food related; Drug related	Microbiota(BIGG:asp__L ChEBI:17053 KEGG:C00049,D00013); Food related(FooDB:FDB012567 HMDB:HMDB0000191); Drug related(DrugBank:DB00128 KEGG:C00049,D00013)	T3_negative	Amino acid and Its metabolites	Amino acids	C4H7NO4	132.03	133.037	0.7898	[M-H]-	0.203916	1	0.9676	rp	56-84-8	5960	5206	C00049	33628.4	45345.1	49685.2	24905.7	47043.7	25240.5	37370.1	31992.5	44697.1	36551.4	22267.2	13805.7	7240.1	24094.9	22978.4	7338.45	13178.8	11263.6	17259.5	2025.73	15356	14329.9	3157.89	19791	16251.5	17029.7	5944.55	17748.3
M_110	L-Tryptophan	HMDB0000929	C00078	Human; Microbiota; Food related; Drug related; Environment	Microbiota(BIGG:trp__L ChEBI:16828 KEGG:C00078,D00020); Food related(FooDB:FDB002250 HMDB:HMDB0000929 T3DB:T3D4369); Drug related(DrugBank:DB00150 KEGG:C00078,D00020 T3DB:T3D4369); Environment(HMDB:HMDB0000929)	T3_positive	Amino acid and Its metabolites	Amino acids	C11H12N2O2	227.079	204.09	2.3903	[M+Na]+	0.0545842	1	0.8016	rp	73-22-3	6305	5879	C00078	2637.91	2097.05	2524.77	5132.06	2796.53	3371.36	2391.67	1212.32	2234.79	2526.26	6554.62	3795.09	4630.92	1732.87	5811.46	5189.15	4934.95	10667.9	5376.91	8602.77	6413.2	8383.66	6629.62	3581.36	8432.28	5319.04	5421.46	5103.21
M_106	L-Valine	HMDB0000883	C00183	Human; Microbiota; Food related; Drug related; Environment	Microbiota(BIGG:val__L ChEBI:16414 KEGG:C00183,D00039); Food related(FooDB:FDB004905 HMDB:HMDB0000883 T3DB:T3D4370); Drug related(DrugBank:DB00161 KEGG:C00183,D00039 T3DB:T3D4370); Environment(HMDB:HMDB0000883)	T3_negative	Amino acid and Its metabolites	Amino acids	C5H11NO2	116.072	117.079	1.0836	[M-H]-	0.2	1	0.6558	rp	72-18-4	6287	5842	C00183	651.85	457.35	1017.26	1180.65	1755.8	5386.39	919	942.25	728.55	1185.67	6036.01	1326.61	8315.88	950.14	3029.76	4549.74	4572.14	12088.4	5632.76	4200.03	3161.86	9949.86	2796.77	3676.55	7552.46	2459.9	4506.28	2905.05
M_178	LysoPC(18:0/0:0)	HMDB0010384	C04230	Human; Microbiota; Food related	Microbiota(KEGG:C04230); Food related(FooDB:FDB027535 HMDB:HMDB0010384)	T3_positive	GP	LPC	C26H54NO7P	506.359	523.364	7.3239	[M+H-H2O]+	11.4767	1	0.8759	rp	19420-57-6	497299	-	C00157	2009.47	2538.2	389.03	1852.22	4426.96	1751.72	609.64	4084.41	2547.74	2206.17	1620.9	1765.35	557.33	2314.71	1672.91	2247.57	4541.2	376.5	889.58	599.38	5935.7	8125.78	7079.39	21780	8624.11	6540.85	3021.06	2927.89
M_76	Sarcosine	HMDB0000271	C00213	Human; Microbiota; Food related; Drug related	Microbiota(BIGG:sarcs ChEBI:15611 KEGG:C00213); Food related(FooDB:FDB004048 T3DB:T3D4458); Drug related(DrugBank:DB12519)	T3_negative	Amino acid and Its metabolites	Amino acids	C3H7NO2	88.0404	89.0477	0.8254	[M-H]-	0.787334	1	0.9505	rp	107-97-1	1088	51	C00213	36562.6	47593.3	45827.8	23723.7	47378.9	22032	33303.2	23524.2	50188.6	34462.2	11623.6	25558.6	11699.8	26727.2	31655.7	4005.63	7368.26	8809.78	20392	13151.3	12524.3	11680.7	5345.1	12539.6	10706.7	21649.1	8090.74	7817.97
Table 2. 11 candidate biomarkers used for molecular subtypes classification. ID refers to the metabolite mapping number used in this article.
[truncated: 7 more columns]

## Sheet: Table 3
ID	Compounds	HMDB	CHEBI	KEGGID	Origin	Links	Mode	Class I	Class II	Formula	Q1 (Da)	Molecular weight (Da)	RT (min)	Adduct	Mass error	Level	score	LC mode	CAS	PubChem	Metlin	cpd_ID	CTRL_1	CTRL_2	CTRL_3	CTRL_4	CTRL_12	CTRL_13	CTRL_15	CTRL_16	CTRL_17	CTRL_18	IDH_1	IDH_2	IDH_4	IDH_5	IDH_6	IDH_7	IDH_8	IDH_9	IDH_10	IDH_11	WT_1	WT_2	WT_3	WT_4	WT_7	WT_9	WT_10
M_91	Cholic acid	HMDB0000619	CHEBI:16359	C00695	Human; Microbiota; Food related; Drug related	Microbiota(BIGG:cholate KEGG:C00695,D10699); Food related(FooDB:FDB012810 HMDB:HMDB0000619 T3DB:T3D4343); Drug related(DrugBank:DB02659 KEGG:C00695,D10699)	T3_negative	Bile acids	Bile acids	C24H40O5	407.279	408.288	6.0958	[M-H]-	5.03324	1	0.9588	rp	81-25-4	221493	206	C00695	4817.34	8221.11	8815.55	10229.2	8932.2	9728.19	8662.76	21860.5	9612.4	10255.3	11813.7	10925.6	9956.43	10342.5	10030.9	10046.6	9056.22	11038.6	7954.63	10260	19801.9	12186.8	11202.4	11675.3	6221.25	33398.1	9482.16
M_108	Citrulline	HMDB0000904	CHEBI:16349	C00327	Human; Microbiota; Food related; Drug related	Microbiota(BIGG:citr__L ChEBI:16349 KEGG:C00327,D07706); Food related(FooDB:FDB011841 HMDB:HMDB0000904 T3DB:T3D4295); Drug related(DrugBank:DB00155 KEGG:C00327,D07706 T3DB:T3D4295)	T3_positive	Amino acid and Its metabolites	Amino acids	C6H13N3O3	176.103	175.096	0.7872	[M+H]+	1.08135	1	0.9405	rp	372-75-8	9750	16	C00327	2684.49	1113.57	470.88	1077.97	920.69	7860.27	4164.23	1626.08	3298.98	1594.61	8826.04	2555.93	19126.2	1302.92	2728.88	3491.87	6821.21	4131.5	1058.57	5813.21	13341.4	9639.24	2906.49	11433.1	1918.63	3570.67	1894.5
M_38	L-Tyrosine	HMDB0000158	CHEBI:17895	C00082	Human; Microbiota; Food related; Drug related; Environment	Microbiota(BIGG:tyr__L ChEBI:17895 KEGG:C00082,D00022); Food related(FooDB:FDB000446 HMDB:HMDB0000158); Drug related(DrugBank:DB00135 KEGG:C00082,D00022); Environment(HMDB:HMDB0000158)	T3_positive	Amino acid and Its metabolites	Amino acids	C9H11NO3	182.081	181.074	1.3125	[M+H]+	1.58015	1	0.9498	rp	60-18-4	6057	34	C00082	88089.8	48476.8	73911.4	193607	125761	439444	93818	96070.3	141576	79368.4	396653	171908	298283	43075	132799	224842	261587	317847	166140	224614	262140	420709	351943	216479	432531	181755	201321
M_107	Nicotinamide-Adenine-Dinucleotide	HMDB0000902	CHEBI:15846	C00003	Human; Microbiota; Food related; Drug related	Microbiota(BIGG:nad KEGG:C00003); Food related(FooDB:FDB022309); Drug related(DrugBank:DB14128 KEGG:C00003)	T3_positive	Nucleotide and Its metabolites	Nucleotide and Its metabolites	C21H28N7O14P2+	664.115	664.117	1.3474	[M+H]+	0.803555	1	0.9202	rp	53-84-9 | 151411-04-0 | 121053-11-0 | 65085-09-8 | 865-05-4	5893	-	C00003	595958	237976	794403	163839	497278	111355	465662	215591	603606	101703	507168	89917	14653.4	175028	344402	602431	596239	41092.1	138754	112864	165277	9358.6	85305.4	129887	711899	65446	466128
M_80	Uric acid	HMDB0000289	CHEBI:27226	C00366	Human; Microbiota; Food related; Drug related	Microbiota(BIGG:urate ChEBI:17775 KEGG:C00366); Food related(FooDB:FDB015350 HMDB:HMDB0000289); Drug related(DrugBank:DB08844)	T3_positive	Organic acid and Its derivatives	Organic acid and Its derivatives	C5H4N4O3	169.035	168.028	0.845	[M+H]+	2.72308	1	0.8262	rp	69-93-2	1175	88	C00366	891.46	1660.41	1282.89	14136.2	4986.26	27602.5	10027.6	12717.1	1101.83	5003.58	15891.8	1808.21	12814.4	5304.46	4992.64	5303.91	3987.93	6598.17	2599.36	5770.72	18785.7	16120.2	5962.5	17159.2	15118	11040.6	4575.43
M_26	Xylose	HMDB0000098	CHEBI:65327	C00181	Human; Microbiota; Food related; Drug related; Environment	Microbiota(BIGG:xyl__D ChEBI:15936,53455 KEGG:C00181,D06346); Food related(FooDB:FDB005944 HMDB:HMDB0000098 T3DB:T3D4926); Drug related(DrugBank:DB09419 KEGG:C00181,D06346); Environment(HMDB:HMDB0000098)	T3_negative	Carbohydrates and Its metabolites	Sugars	C5H10O5	195.045	150.053	0.8791	[M+HCOO]-	10.9111	1	0.8106	rp	58-86-6	135191	314	C00181	77073	102873	103576	243553	100356	70681.4	90447.6	82361.4	98079.6	84974.4	99246.1	91630.7	109772	84745.2	85665.4	79507.6	118705	111787	121737	104866	110479	98785.7	103238	131708	90855.1	78036.9	167222
M_17	Creatine	HMDB0000064	CHEBI:16919	C00300	Human; Microbiota; Food related; Drug related; Environment	Microbiota(KEGG:C00300); Food related(FooDB:FDB005403 HMDB:HMDB0000064 T3DB:T3D4290); Drug related(DrugBank:DB00148 T3DB:T3D4290); Environment(HMDB:HMDB0000064 T3DB:T3D4290)	T3_positive	Organic acid and Its derivatives	Organic acid and Its derivatives	C4H9N3O2	132.077	131.07	0.7934	[M+H]+	0.0297168	1	0.9528	rp	57-00-1	586	7	C00300	6.21523e+06	9.03042e+06	7.77001e+06	4.43178e+06	6.78794e+06	3.05629e+06	5.51487e+06	5.59156e+06	8.6317e+06	6.5398e+06	1.76084e+06	7.87642e+06	5.40757e+06	6.7619e+06	4.78691e+06	797651	2.30849e+06	3.12312e+06	6.3512e+06	5.2807e+06	3.30654e+06	4.83014e+06	1.07828e+06	3.46601e+06	2.60166e+06	4.14967e+06	3.30467e+06
M_45	L-Histidine	HMDB0000177	CHEBI:15971	C00135	Human; Microbiota; Food related; Drug related; Environment	Microbiota(BIGG:his__L ChEBI:15971 KEGG:C00135,D00032); Food related(FooDB:FDB011856 HMDB:HMDB0000177 T3DB:T3D4363); Drug related(DrugBank:DB00117 KEGG:C00135,D00032 T3DB:T3D4363); Environment(HMDB:HMDB0000177 T3DB:T3D4363)	T3_positive	Amino acid and Its metabolites	Amino acids	C6H9N3O2	178.058	155.07	0.7077	[M+Na]+	1.7	1	0.8423	rp	71-00-1	6274	21	C00135	4135.85	5272.58	1780.71	3897.41	2279.94	2988.28	3718.07	1153.64	6254.2	3481.82	4925.21	1670.8	3592.75	3222.13	3129.67	2483.03	2029.48	5635.49	3681.84	4615.84	5785.53	4673.73	4228.75	4508.4	4143.93	2582.42	2272.68
M_16	Hydrocortisone	HMDB0000063	CHEBI:180955	C00735	Human; Microbiota; Food related; Drug related	Microbiota(KEGG:C00735,D00088); Food related(FooDB:FDB021888 HMDB:HMDB0000063); Drug related(DrugBank:DB00741 KEGG:C00735,D00088)	T3_positive	Hormones and hormone related compounds	Hormones and hormone related compounds	C21H30O5	363.216	362.209	4.8458	[M+H]+	5.49057	1	0.8979	rp	50-23-7	5754	-	C00735	786.83	870.13	2173.17	8560.63	16313.8	32229	29161.9	33985.2	6297.46	52766.5	25701.2	9289.8	1000.05	2225.75	3025.57	587.31	1988.22	7109.23	4492.02	6430.72	4577.79	6477.18	8471.11	2642.14	6190.47	10872.5	5160.3
M_111	Uridine-5'-diphosphoglucuronic Acid (sodium salt hydrate)	HMDB0000935	CHEBI:17200	C00167	Human; Microbiota; Food related; Drug related	Microbiota(BIGG:udpglcur ChEBI:17200 KEGG:C00167,G10612); Food related(FooDB:FDB031240 HMDB:HMDB0000935); Drug related(DrugBank:DB03041)	T3_negative	Nucleotide and Its metabolites	Nucleotide and Its metabolites	C15H22N2O18P2	579.025	580.034	1.6859	[M-H]-	3.94248	1	0.8609	rp	2616-64-0	-	-	C00167	2966.92	7572.57	10254.2	5595.16	4242.95	2412.07	3485.24	7208.56	8173.69	8794.53	21693.8	9976.62	3205.62	6206.61	3732.4	9786.67	29999.7	53642.9	19742.8	9641.47	4298.38	118144	18119.5	12839.3	22239.8	10858.7	19767.9
M_1	Butanone acid	HMDB0000005	CHEBI:30831	C00109	Human; Microbiota; Food related; Drug related	Microbiota(BIGG:2obut ChEBI:16763,30831 KEGG:C00109); Food related(FooDB:FDB030356 HMDB:HMDB0000005); Drug related(DrugBank:DB04553)	T3_positive	Organic acid and Its derivatives	Organic acid and Its derivatives	C4H6O3	144.065	102.032	1.917	[M+CH3CN+H]+	1.225	1	0.5698	rp	600-18-0	58	-	C00109	6732.14	9039.05	12572.7	3904.57	4438.77	4725.35	5712.73	6152.1	9479.79	6482.53	23036.3	44275.4	29309.4	13482.3	9622.62	10380.7	1414.52	8892.88	16863.7	2219.52	27129.8	14866.7	34828	27039	11773	18030.4	24671.7
M_31	Glutathione	HMDB0000125		C00051	Human; Microbiota; Food related; Drug related; Environment	Microbiota(BIGG:gthrd ChEBI:16856 KEGG:C00051,C02471,D00014); Food related(FooDB:FDB001498 HMDB:HMDB0000125 T3DB:T3D4352); Drug related(DrugBank:DB00143 KEGG:C00051,C02471,D00014 T3DB:T3D4352); Environment(HMDB:HMDB0000125)	T3_negative	Amino acid and Its metabolites	Amino acid derivatives	C10H17N3O6S	306.076	307.084	0.8791	[M-H]-	2.13921	1	0.9128	rp	70-18-8	124886	44	C00051	1.11738e+06	1.50548e+06	1.44802e+06	509541	956040	137046	559892	448255	1.45683e+06	832256	643653	717992	503081	739376	375155	731894	911530	1.12952e+06	889706	750709	647876	1.09112e+06	1.31269e+06	1.5327e+06	760114	1.199e+06	1.05768e+06
M_10	Betaine	HMDB0000043		C00719	Human; Microbiota; Food related; Drug related	Microbiota(BIGG:glyb); Food related(HMDB:HMDB0000043); Drug related(DrugBank:DB04455)	T3_positive	Others	Others	C5H11NO2	118.086	117.079	0.7934	[M+H]+	0.675587	1	0.9597	rp	107-43-7	247	-	C00719	393515	700286	523318	291576	761584	232064	593908	523021	602510	411360	226428	371836	313469	320552	334483	305217	662891	452182	517846	1.99507e+06	539562	281645	166817	427411	304818	253125	408754
M_156	Arachidic acid	HMDB0002212		C06425	Human; Microbiota; Food related; Environment	Microbiota(BIGG:arach KEGG:C06425); Food related(FooDB:FDB004028 HMDB:HMDB0002212); Environment(HMDB:HMDB0002212)	T3_negative	FA	FFA	C20H40O2	312.298	312.303	7.9503	[M-]-	13.6507	1	0.7538	rp	506-30-9	10467	401	C06425	4200.45	2623.4	6116.73	1050.98	4532.6	11813	3074.7	9860.95	3254.39	7440.52	5533.65	4841.46	2460.48	5840.87	11464.3	4633.51	6958.62	1187.26	3089.2	2993.48	4124.18	2427.28	965.07	1472.11	5585.81	3035.27	8510.66
M_21	Cysteinylglycine	HMDB0000078		C01419	Human; Microbiota; Food related	Microbiota(BIGG:cgly ChEBI:4047 KEGG:C01419); Food related(FooDB:FDB021891 HMDB:HMDB0000078)	T3_positive	Amino acid and Its metabolites	Small Peptide	C5H10N2O3S	179.048	178.041	1.2996	[M+H]+	1.20262	1	0.7894	rp	19246-18-5	439498	5134	C01419	197363	220221	343452	146874	190202	22229.3	117900	117941	378225	114984	108226	89995.5	50296.2	117474	32346.8	107773	157049	123704	104688	89514	84946.8	241278	134107	353560	126104	105196	187001
M_175	20alpha-Hydroxycholesterol	HMDB0006283		C05500	Human; Food related; Drug related	Food related(FooDB:FDB023876 HMDB:HMDB0006283); Drug related(DrugBank:DB04704)	T3_positive	Hormones and hormone related compounds	Hormones and hormone related compounds	C27H46O2	385.345	402.35	8.772	[M+H-H2O]+	0.214395	1	0.7279	rp	516-72-3	121935	-	C05500	26066.4	24112.1	37107.4	9024.34	16447.4	23936	15449.7	19511.9	54252.9	26843.6	17765.7	15740	5725.17	20836.3	12732.7	20861.8	17042	828.46	2096.77	17437.5	23264.2	10614.2	25303	20718.3	7468.08	7973.22	925.25
M_140	Isopentenyl pyrophosphate	HMDB0001347		C00129	Human; Microbiota; Food related; Drug related	Microbiota(BIGG:ipdp ChEBI:16584 KEGG:C00129); Food related(FooDB:FDB030946 HMDB:HMDB0001347); Drug related(DrugBank:DB04714)	T3_positive	Organic acid and Its derivatives	Phosphoric acids	C5H12O7P2	284.972	246.006	0.6725	[M+K]+	9.42978	1	0.5964	rp	358-71-4	1195	6181	C00129	2.39737e+06	1.83709e+06	1.83684e+06	2.26707e+06	1.88762e+06	1.83796e+06	2.12172e+06	2.14022e+06	1.92304e+06	2.6336e+06	2.31412e+06	2.17975e+06	2.39125e+06	1.88598e+06	2.54709e+06	2.82305e+06	1.29112e+06	1.72863e+06	1.39805e+06	2.09444e+06	2.70738e+06	1.92715e+06	2.52145e+06	1.98984e+06	1.80234e+06	2.4362e+06	1.04353e+06
M_51	Inosine	HMDB0000195		C00294	Human; Microbiota; Food related; Drug related	Microbiota(BIGG:ins ChEBI:17596 KEGG:C00294,D00054); Food related(FooDB:FDB011802 HMDB:HMDB0000195); Drug related(DrugBank:DB04335 KEGG:C00294,D00054)	T3_negative	Nucleotide and Its metabolites	Nucleotide and Its metabolites	C10H12N4O5	535.153	268.081	1.6707	[2M-H]-	2.19815	1	0.9725	rp	58-63-9	135398641	-	C00294	139105	257191	433611	107678	550666	28609.6	282416	140931	363230	346322	29923.2	499410	85233.4	112009	103289	135740	389563	413419	284785	45559	37494.5	168652	115237	140373	132260	137445	85861.2
M_12	Adenosine	HMDB0000050		C00212	Human; Microbiota; Food related; Drug related; Environment	Microbiota(BIGG:adn ChEBI:16335 KEGG:C00212,D00045); Food related(FooDB:FDB003554 HMDB:HMDB0000050 T3DB:T3D4275); Drug related(DrugBank:DB00640 KEGG:C00212,D00045 T3DB:T3D4275); Environment(HMDB:HMDB0000050)	T3_negative	Nucleotide and Its metabolites	Nucleotide and Its metabolites	C10H13N5O4	266.089	267.097	1.9194	[M-H]-	0.956404	1	0.9735	rp	58-61-7	60961	86	C00212	56624.5	220591	43736.9	46643.6	98869.5	5964.13	48727.5	23507	169998	26673.9	17114.6	42224.1	43269.7	51944.7	16025.8	25945.4	59791.2	61042.6	84890.9	46109.8	13360.4	65835.6	10604.1	42423.8	84484.3	56142.2	86789.1
M_59	NADPH	HMDB0000221		C00005	Human; Microbiota; Food related; Drug related	Microbiota(BIGG:nadph ChEBI:16474 KEGG:C00005); Food related(FooDB:FDB021909 HMDB:HMDB0000221); Drug related(DrugBank:DB02338)	T3_negative	CoEnzyme and vitamins	CoEnzyme and vitamins	C21H30N7O17P3	742.067	745.091	1.2821	[M-H]-	1.2208	1	0.8803	rp	53-57-6	5884	3691	C00005	10097.7	10853.2	15597.3	19819.8	10200.3	5128.75	8752.23	10195.3	17440.7	8411.45	17447.5	4730.71	3226.19	10967.9	14735.8	13830.2	19452.7	4799.39	4858.85	7906.07	6230.52	4280.23	3950.73	12772.8	19751.6	4331.44	35790.3
M_88	Chenodeoxycholic acid	HMDB0000518		C02528	Human; Microbiota; Food related; Drug related	Microbiota(KEGG:C02528,D00163); Food related(FooDB:FDB022087 HMDB:HMDB0000518); Drug related(DrugBank:DB06777 KEGG:C02528,D00163)	T3_negative	Bile acids	Bile acids	C24H40O4	391.284	392.293	6.7136	[M-H]-	1.83523	1	0.9562	rp	474-25-9	10133	207	C02528	1913.06	1843.42	2441.32	4445.3	2080.87	3510.08	1563.26	9278.26	2821.68	2640.06	5844.38	1852.04	2644.43	3571.25	2906.93	2191.7	4010.05	3455.75	3021.21	3401.29	11879.3	4191.99	5079.84	13481.8	3489.56	12641	7285.5
M_4	Deoxycytidine	HMDB0000014		C00881	Human; Microbiota; Food related; Drug related	Microbiota(BIGG:dcyt ChEBI:15698 KEGG:C00881,D12465); Food related(FooDB:FDB021871 HMDB:HMDB0000014); Drug related(DrugBank:DB02594 KEGG:C00881,D12465)	T3_positive	Nucleotide and Its metabolites	Nucleotide and Its metabolites	C9H13N3O4	245.123	227.091	0.5507	[M+NH4]+	3.06331	1	0.7604	rp	951-77-9	13711	3367	C00881	5697.15	11204.5	8980.38	11728.7	9353.8	4564.68	8124.13	7563.25	13849.2	12676	17265.1	13806.9	16825.4	9888.8	9749.71	14972.3	28572.6	3326.08	13220.3	12642.4	13475	16992.8	13591.1	15313.1	12351.6	8245.61	16201.2
M_28	2'-Deoxyadenosine	HMDB0000101		C00559	Human; Microbiota; Food related	Microbiota(BIGG:dad_2 ChEBI:17256 KEGG:C00559); Food related(FooDB:FDB021894 T3DB:T3D4958)	T3_positive	Nucleotide and Its metabolites	Nucleotide and Its metabolites	C10H13N5O3	274.092	251.102	1.2954	[M+Na]+	1.15	1	0.9303	rp	958-09-8	13730	3382	C00559	24775.6	19308.8	27295.8	18903.5	25160	21963.7	22386.5	23046.9	30879.2	24988.8	52966	14979.6	6313.62	20385.2	18037.5	20656.6	19975.4	28141.5	15086	7692.26	25816.7	21313.7	27905.7	10386.9	15162.4	16436.5	15619.9
M_2	2-Hydroxybutanoic Acid	HMDB0000008		C05984	Human; Microbiota; Food related	Microbiota(BIGG:2hb KEGG:C05984); Food related(FooDB:FDB021867)	T3_negative	Organic acid and Its derivatives	Organic acid and Its derivatives	C4H8O3	103.04	104.047	1.7126	[M-H]-	0.0797678	1	0.9094	rp	600-15-7	11266	-	C05984	24761.8	15149.1	16079.7	22682	28098	22935.9	37236	56261.3	30882.9	44638.4	31750.6	20025.5	38844.1	14229	27826.3	13168	52280.8	97944.6	65861.6	77422.4	34968.5	80098.2	30519.1	31907	44327	24295.2	21991.2
M_70	Taurine	HMDB0000251		C00245	Human; Microbiota; Food related; Drug related	Microbiota(BIGG:taur ChEBI:15891 KEGG:C00245,D00047); Food related(FooDB:FDB003191 HMDB:HMDB0000251); Drug related(DrugBank:DB01956 KEGG:C00245,D00047)	T3_negative	Amino acid and Its metabolites	Amino acids	C2H7NO3S	124.007	125.015	0.7898	[M-H]-	0.785309	1	0.9791	rp	107-35-7	1123	31	C00245	116531	98119.7	109594	76986.7	93988.4	71951.2	79365.3	92669.4	92427.4	80551.3	135027	76359.7	69781.8	98699.4	75914.4	117774	90816	138985	208499	112941	125403	177224	65069.1	204139	83561.9	113634	62254.5
M_19	2'-Deoxyinosine	HMDB0000071		C05512	Human; Microbiota; Food related; Drug related	Microbiota(BIGG:din ChEBI:28997 KEGG:C05512); Food related(FooDB:FDB012323 HMDB:HMDB0000071); Drug related(DrugBank:DB02380)	T3_negative	Nucleotide and Its metabolites	Nucleotide and Its metabolites	C10H12N4O4	251.078	252.086	1.8058	[M-H]-	0.555948	1	0.9032	rp	890-38-0	135398593	3383	C05512	2215.69	641.98	732.9	2813.82	681.82	5170.18	432.24	2188.6	511.93	559.48	8960.8	6397.41	702.38	2329.24	1058.19	2007.19	8357.65	20866.5	10052.1	8910.55	1738.05	27665.9	4825.53	920.09	35403.6	2106.86	10271.4
M_151	3,4-Dihydroxymandelic acid	HMDB0001866		C05580	Human; Microbiota; Food related	Microbiota(KEGG:C05580); Food related(FooDB:FDB030383 HMDB:HMDB0001866)	T3_negative	Benzene and substituted derivatives	Phenolics	C8H8O5	367.068	184.037	4.4262	[2M-H]-	3.05449	1	0.6185	rp	775-01-9	85782	696	C05580	2380.24	2185.85	2203.52	1951.17	1945.5	1111.75	1265.61	3089.04	2033.23	2145.16	2337.7	2174.89	2205.29	2362.31	2422.21	1899.82	1697.34	1661.2	2018.02	1947.7	2245.71	1038.73	2457.82	1391.01	2042.25	1316.48	1454.6
M_106	Formylanthranilic acid	HMDB0000883		C00183	Human; Microbiota; Food related; Drug related; Environment	Microbiota(BIGG:val__L ChEBI:16414 KEGG:C00183,D00039); Food related(FooDB:FDB004905 HMDB:HMDB0000883 T3DB:T3D4370); Drug related(DrugBank:DB00161 KEGG:C00183,D00039 T3DB:T3D4370); Environment(HMDB:HMDB0000883)	T3_negative	Amino acid and Its metabolites	Amino acids	C5H11NO2	116.072	117.079	1.0836	[M-H]-	0.2	1	0.6558	rp	72-18-4	6287	5842	C00183	651.85	457.35	1017.26	1180.65	1755.8	5386.39	919	942.25	728.55	1185.67	6036.01	1326.61	8315.88	950.14	3029.76	4549.74	4572.14	12088.4	5632.76	4200.03	3161.86	9949.86	2796.77	3676.55	7552.46	2459.9	4506.28
M_76	Sarcosine	HMDB0000271		C00213	Human; Microbiota; Food related; Drug related	Microbiota(BIGG:sarcs ChEBI:15611 KEGG:C00213); Food related(FooDB:FDB004048 T3DB:T3D4458); Drug related(DrugBank:DB12519)	T3_negative	Amino acid and Its metabolites	Amino acids	C3H7NO2	88.0404	89.0477	0.8254	[M-H]-	0.787334	1	0.9505	rp	107-97-1	1088	51	C00213	36562.6	47593.3	45827.8	23723.7	47378.9	22032	33303.2	23524.2	50188.6	34462.2	11623.6	25558.6	11699.8	26727.2	31655.7	4005.63	7368.26	8809.78	20392	13151.3	12524.3	11680.7	5345.1	12539.6	10706.7	21649.1	8090.74
M_35	Glycocholic acid	HMDB0000138		C01921	Human; Microbiota; Food related; Drug related	Microbiota(BIGG:glyc__R HMDB:HMDB0000138 KEGG:C01921); Food related(FooDB:FDB012346 HMDB:HMDB0000138); Drug related(DrugBank:DB02691)	T3_negative	Bile acids	Bile acids	C26H43NO6	464.301	465.309	5.432	[M-H]-	4.61813	1	0.9541	rp	475-31-0	10140	-	C01921	2728.49	581.63	1952.3	4020.33	4989.39	9250.38	2665.92	18321.1	2124.35	3025.81	8326.47	548.16	4087.97	740.04	4434.78	4146.39	865.83	2543.47	1090.14	3661.05	7948.15	5573.52	2540.72	2223.71	4908.04	7731.59	6432.02
M_62	Oxoadipic acid	HMDB0000225		C00322	Human; Microbiota; Food related	Microbiota(BIGG:2oxoadp ChEBI:15753 KEGG:C00322); Food related(FooDB:FDB003362 HMDB:HMDB0000225 T3DB:T3D4257)	T3_negative	Organic acid and Its derivatives	Organic acid and Its derivatives	C6H8O5	141.017	160.037	0.6989	[M-H2O-H]-	5.99611	1	0.8543	rp	3184-35-8	71	5234	C00322	360700	271890	252242	65885.3	291555	370774	253439	312911	256265	322855	275366	276979	174688	289404	306633	387826	334725	222444	283838	183081	378060	316493	402681	222204	278948	292342	25783.9
M_171	(-)-leukotoxin B	HMDB0004702		C14826	Human; Microbiota; Food related	Microbiota(ChEBI:38299 KEGG:C14826); Food related(FooDB:FDB023414 HMDB:HMDB0004702)	T3_negative	Aldehyde,Ketones,Esters	Esters	C18H32O3	295.227	296.235	6.9383	[M-H]-	1.625	1	0.8515	rp	503-07-1 | 32381-42-3	5281128	-	C08368	2129.87	2230.49	3172.41	2659.64	4192.9	7399.87	2334.42	5371.68	4009.7	3173.29	3776.05	2646.92	4698.21	3104.09	10639.5	5750.73	3525.07	3448.17	1833.65	3800.77	3194.27	3801.73	4444.71	4060.23	6384.59	3702.92	4328.85
M_169	Formylanthranilic acid	HMDB0004089		C05653	Human; Microbiota; Food related	Microbiota(KEGG:C05653); Food related(FooDB:FDB023309)	T3_positive	Benzene and substituted derivatives	Benzene and substituted derivatives	C8H7NO3	166.049	165.043	2.8805	[M+H]+	2.28648	1	0.8235	rp	3342-77-6	101399	-	C05653	2316.21	2920.73	2431.76	1311.37	1571.31	2214.74	1333.99	1642.35	3757.1	1662.32	971.66	2218.03	2474.27	2913.36	5984.58	7136.26	2164.28	2080.14	1174.18	796.16	2411.12	2048.79	2591.94	2475.95	2870.23	659.73	1862.77
M_29	Dulcitol	HMDB0000107		C01697	Human; Microbiota; Food related	Microbiota(BIGG:galt ChEBI:16813 KEGG:C01697); Food related(FooDB:FDB006453 HMDB:HMDB0000107 T3DB:T3D4349)	T3_negative	Carbohydrates and Its metabolites	Sugar alcohols	C6H14O6	163.061	182.079	0.7898	[M-H2O-H]-	0.85	1	0.9879	rp	608-66-2	11850	5148	C01697	1010.03	1285.63	1720.55	815.02	1107.74	3655.41	1850.47	2023.34	2836.47	1878.68	4809.77	2929.51	6022.09	2306.22	3549.76	2645.52	7299.38	5485.35	3625.89	5805.41	2438.2	5969.31	3114.28	4531.06	6652.94	3829.76	8402.76
M_180	Phenethylamine	HMDB0012275		C05332	Human; Microbiota; Food related; Drug related	Microbiota(BIGG:peamn ChEBI:18397 HMDB:HMDB0012275 KEGG:C05332); Food related(FooDB:FDB010580 HMDB:HMDB0012275); Drug related(DrugBank:DB04325)	T3_negative	Alcohol and amines	Amines	C8H11N	120.076	121.089	2.4208	[M-H]-	15.9056	1	0.7526	rp	64-04-0	1001	-	C05332	4309.84	4367.53	4585.02	3242.56	4437.77	3190.49	4057.75	4202.9	3451.09	4017.07	4392.92	4287.6	3587.49	4372.1	4366.6	3696.33	3713.45	3707.02	4210.13	3626.7	3416.91	3954.86	3805.98	4103.84	3360.01	3963.04	3189.17
M_92	Glycochenodeoxycholic acid	HMDB0000637		C05466	Human; Microbiota; Food related; Drug related	Microbiota(HMDB:HMDB0000637); Food related(FooDB:FDB022157 HMDB:HMDB0000637); Drug related(DrugBank:DB02123)	T3_negative	Bile acids	Bile acids	C26H43NO5	448.305	449.314	6.1472	[M-H]-	3.83666	1	0.8017	rp	640-79-9	12544	-	C05466	973.76	947.48	1815.16	7484.15	16063.5	28768.5	9822.84	58803.4	8559.25	7722.86	51670.4	11820.7	3480.58	2390.58	16659.3	4542.44	6792.6	11837.2	619.42	11349	51380.6	24100.3	13367.1	8278.75	6906.76	26720.5	41331.2
M_170	Acetyl-N-formyl-5-methoxykynurenamine	HMDB0004259		C05642	Human; Microbiota; Food related	Microbiota(KEGG:C05642); Food related(FooDB:FDB023355)	T3_positive	Alcohol and amines	Amines	C13H16N2O4	265.118	264.111	3.2816	[M+H]+	0.425641	1	0.7545	rp	52450-38-1	171161	-	C05642	945.49	881.75	3543.27	1973.64	9111.84	10003.7	229666	6158.47	2955.12	3021.54	3543.57	2712.06	14283.7	4969.05	877.41	8493.29	2800.89	8098.49	5832.56	8376.17	11044.5	43099.9	3479.14	7512.5	21352.9	12349.8	9857.09
M_160	gamma-Linolenic Acid	HMDB0003073		C06426	Human; Microbiota; Food related; Drug related	Microbiota(KEGG:C06426,D07213); Food related(FooDB:FDB002943 HMDB:HMDB0003073); Drug related(DrugBank:DB13854 KEGG:C06426,D07213)	T3_negative	FA	FFA	C18H30O2	277.217	278.225	7.6419	[M-H]-	0.9042	1	0.9763	rp	506-26-3	5280933	386	C06426	8234.77	7813.23	16447.7	11012.1	15975.9	71588.7	13466.1	9021.17	18971	19054.8	12660	16671.8	76652.2	14139.6	78802.8	43021.2	23767.8	17513.1	11339	21131	12065	12006.8	23922.2	36170	72039.5	7627.79	17200.2
M_128	S-adenosylmethionine	HMDB0001185		C00019	Human; Microbiota; Food related; Drug related	Microbiota(BIGG:amet ChEBI:15414 KEGG:C00019); Food related(FooDB:FDB031152 T3DB:T3D4456); Drug related(DrugBank:DB00118 T3DB:T3D4456)	T3_positive	Nucleotide and Its metabolites	Nucleotide and Its metabolites	C15H22N6O5S	399.143	398.137	0.759	[M+H]+	8.16071	1	0.8629	rp	29908-03-0 | 17176-17-9 | 485-80-3 | 78548-84-2 | 91279-78-6	34755	3289	C00019	1931.66	573.46	1077.06	4465.93	4029.95	6499.49	4387.57	1908.02	4650.58	4603.21	67159.4	3289.64	5378.21	5094.62	838.16	9373.29	59018.4	21346.4	30327.3	15908.4	12299.6	37417.9	10266.5	16219.1	15450.2	8595.93	19173.8
M_47	L-Serine	HMDB0000187		C00065	Human; Microbiota; Food related; Drug related; Environment	Microbiota(BIGG:ser__L ChEBI:17115 KEGG:C00065,D00016); Food related(FooDB:FDB012739 HMDB:HMDB0000187 T3DB:T3D4367); Drug related(DrugBank:DB00133 KEGG:C00065,D00016 T3DB:T3D4367); Environment(HMDB:HMDB0000187 T3DB:T3D4367)	T3_positive	Amino acid and Its metabolites	Amino acids	C3H7NO3	106.049	105.043	0.7763	[M+H]+	1.725	1	0.9025	rp	56-45-1	5951	5203	C00065	2529.45	2329.49	857.67	5372.25	729.76	4378.08	1096.64	3516.12	3273.46	1430.66	6143.86	2626.17	9492.74	1449.34	2588.81	1828.63	10313.2	3317.74	8212.63	3043.51	5983.01	6224.29	4118.04	8673.99	6605.41	4929.05	8329.69
M_141	Ibipinabant	HMDB0001372		C00068	Human; Microbiota; Food related; Drug related	Microbiota(BIGG:thmpp ChEBI:9532 KEGG:C00068); Food related(FooDB:FDB022584); Drug related(DrugBank:DB01987)	T3_negative	Heterocyclic compounds	Heterocyclic compounds	C23H20Cl2N4O2S	485.05	486.068	1.832	[M-H]-	20.5668	1	0.7796	rp	464213-10-3	9826744	45159	-	3052.68	3804.03	6773.96	12928.8	7918.16	2160.93	6604.39	6130.73	4473.53	4981.65	3988.25	3446.93	3765.12	2688.23	2140.73	446.48	8901.42	5989.51	2529.73	3171.57	989.08	13201.3	3222.59	2877.49	8184.88	2060.51	5465.3
M_126	cytidine monophosphate N-acetylneuraminic acid	HMDB0001176		C00128	Human; Microbiota; Food related; Drug related	Microbiota(BIGG:cmpacna KEGG:C00128,G10616); Food related(FooDB:FDB022466); Drug related(DrugBank:DB02485)	T3_positive	Nucleotide and Its metabolites	Nucleotide and Its metabolites	C20H31N4O16P	653.109	614.147	2.0044	[M+K]+	0.18828	1	0.7707	rp	3063-71-6	448209	-	C00128	4660.63	3829.36	16941.3	1765.76	4499.09	4412.83	5905.94	3829.07	5720.54	5700.68	5127.67	27412.6	9907.66	14326.6	10977.5	8390.79	6291.73	2527.42	1289.17	1394.91	2243.8	2811.93	78861.4	2818.91	17568.8	12247.1	4824.29
M_69	Thyroxine	HMDB0000248		C01829	Human; Microbiota; Food related; Drug related	Microbiota(KEGG:C01829,D08125); Food related(FooDB:FDB021829); Drug related(DrugBank:DB00451 KEGG:C01829,D08125)	T3_negative	Hormones and hormone related compounds	Hormones and hormone related compounds	C15H11I4NO4	775.679	776.687	5.1891	[M-H]-	1.45296	1	0.9609	rp	51-48-9	5819	-	C01829	1097.98	1786.71	1109.55	2039.04	842.69	4188.58	1077.61	2889.83	1658.77	2071.9	2125.83	1799.88	2129.76	1959.38	4598.47	2542.45	1911.51	1347.94	1343.77	1082.7	1110.48	8451.34	4162.99	2718.26	2861.44	3243.94	3988.59
M_65	Pyruvic Acid	HMDB0000243		C00022	Human; Microbiota; Food related; Drug related	Microbiota(BIGG:pyr ChEBI:15361,32816 HMDB:HMDB0000243 KEGG:C00022); Food related(FooDB:FDB031141 HMDB:HMDB0000243 T3DB:T3D4325); Drug related(DrugBank:DB00119 T3DB:T3D4325)	T3_positive	Organic acid and Its derivatives	Organic acid and Its derivatives	C3H4O3	111.003	88.016	0.5507	[M+Na]+	5.77631	1	0.6785	rp	127-17-3	1060	-	C00022	2954.55	5751.66	4481.12	6670.73	5529.79	2318.5	3998.71	4446.06	6971.43	4827.6	11675.8	7173.94	8486.79	6065.27	4403.74	9970.59	13946.8	4253.02	10349.5	9017.69	5056.6	9210.85	6616.63	11261.1	6033.85	5109.6	14271.2
Table 3. 44 candidate biomarkers used for survival risk prediction. ID refers to the metabolite mapping number used in this article.
[truncated: 9 more columns]
